# Supplementary material
Source: PubMed Central journal article supplement (PMC4487662)

**IB: BRAF**

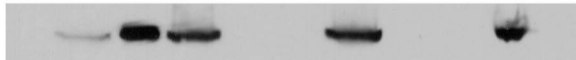

**IB: PAK1**

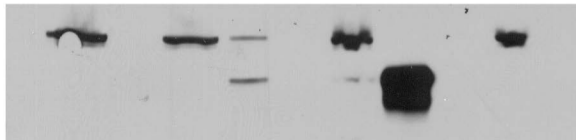

**Unbound**

**Bound**

**IP: BRAF**

**Unbound**

**Bound**

**IP: PAK1**

**Unbound**

**Bound**

**IP: IgG**

**Input**

Supplement: NIHMS635291-supplement-2.pdf [file NIHMS635291-supplement-2.pdf]
